# Supplementary material for: Low Temperature Polyethylene Biodeterioration by Freshwater Microplastics-Associated Bacteria
Source: Research Square preprint supplement (doi:10.21203/rs.3.rs-7863526/v1), 2025-10-30
Supplement: Supplementary file 1 [file 5ebbf59296e675c61b96bf79.pdf]

**Low Temperature Polyethylene Biodeterioration by Freshwater Microplastics-Associated Bacteria**

Abdoullah Hleihel<sup>1,2\*</sup>, Jonas M. Stadfeld<sup>2,\*</sup>, Kira L. Goff<sup>1</sup>, Amelia M. Danzinger<sup>2</sup>, Craig Beaver<sup>3</sup>, Troy Stuart<sup>3</sup>, Shauna Reckseidler-Zenteno<sup>1</sup>, Janelle M. Baker<sup>4</sup>, Srijak Bhatnagar<sup>1,2</sup>

Affiliations:

<sup>1</sup>Faculty of Science and Technology, Athabasca University, Athabasca, AB, Canada

<sup>2</sup>Department of Biological Sciences, University of Calgary, Calgary, AB, Canada

<sup>3</sup>Lands and Resources Department, Bigstone Cree Nation, Wabasca, AB, Canada

<sup>4</sup> Faculty of Humanities and Social Sciences, Athabasca University, Athabasca, AB, Canada

\*Authors contributed equally

Corresponding Author: Srijak Bhatnagar, sbhatnagar@athabascau.ca

16 **Supplementary Information**

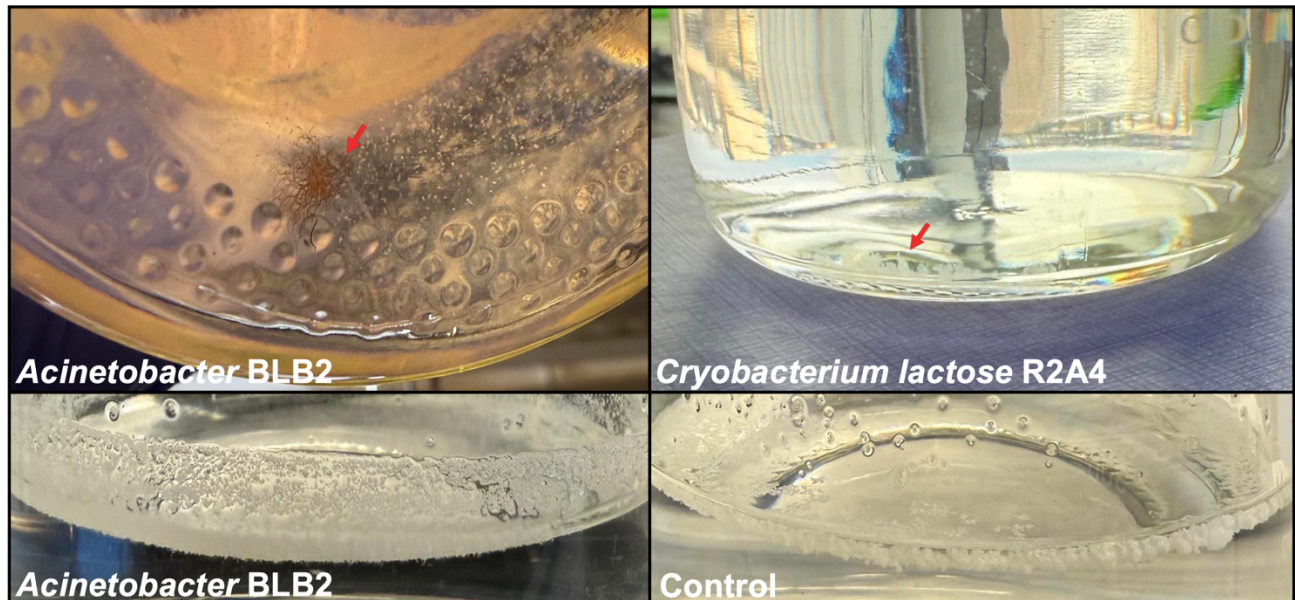

**Supplementary Figure 1. Visual observations of LDPE degradation microcosms.**

(a) *Acinetobacter* BLB2 showing green-brown web-like growth (b) *Cryobacterium* BR2A4 exhibiting translucent floating aggregates (c) *Acinetobacter* BLB2 microcosm highlighting visibly smaller LDPE fragments with increased bulk dispersion compared to (c) control microcosm

18  
19 **Supplementary Data 1.** Metadata of the 14 Isolates used for the LDPE degradation  
20 experiment.

21 **Supplementary Data 2.** Final calculated weight losses of the 14 isolates and  
22 experimental control after a seven month incubation period.

23 **Supplementary Data 3.** Monthly optical Density (600nm) measurements of microcosms  
24 during LDPE degradation experiment.

25 **Supplementary Data 4.** Cell densities (cells/mL) of the 14 isolates including standard  
26 deviation at months five and six of incubation.

27 **Supplementary Data 5.** GCMS results of detected compounds, their assigned  
28 classification, and concentration ( $\mu\text{g/L}$ ) of each based on a C16 response factor after a  
29 seven month incubation period.
