# Supplementary material for: Low Temperature Polyethylene Biodeterioration by Freshwater Microplastics-Associated Bacteria
Source: Research Square preprint supplement (doi:10.21203/rs.3.rs-7863526/v1), 2025-10-30
Supplement: Supplementary file 1 [file 937a493e177b7cfda4cb0096.xlsx]

## Sheet: S1
Supplementary Data 1. Metadata of the 14 Isolates used for the LDPE degradation experiment.
Isolate ID	Encrichment Medium	Isolation Medium	Location	MP Source	Taxonomy	ANI (%)	PlasticDB (>50%)	Hydrocarbon Degradation (CANT-HYD)
BLB2	Bow	Lysogeny Broth	Bow River	Water	d__Bacteria;p__Pseudomonadota;c__Gammaproteobacteria;o__Pseudomonadales;f__Moraxellaceae;g__Acinetobacter;s__Acinetobacter sp002367455	97.67	Alkane-1 monooxygenase (67.5%), Lipase (52.4%), Polyesterase (52.8%)	alkB, almA
BLB8	Bold 1NV	Lysogeny Broth	Bow River	Water	d__Bacteria;p__Pseudomonadota;c__Gammaproteobacteria;o__Pseudomonadales;f__Moraxellaceae;g__Acinetobacter;s__Acinetobacter sp002367455	97.73	Alkane-1 monooxygenase (67.5%), Lipase (52.4%), Polyesterase (52.8%)	alkB, almA
BLB11	Bold 1NV	Lysogeny Broth	Bow River	Water	d__Bacteria;p__Pseudomonadota;c__Gammaproteobacteria;o__Pseudomonadales;f__Moraxellaceae;g__Acinetobacter;s__Acinetobacter sp002367455	97.73	Alkane-1 monooxygenase (67.5%), Lipase (52.4%), Polyesterase (52.8%)	alkB, almA
WLB5	Bow	Lysogeny Broth	North Wabasca Lake	Water	d__Bacteria;p__Pseudomonadota;c__Gammaproteobacteria;o__Pseudomonadales;f__Moraxellaceae;g__Acinetobacter;s__Acinetobacter sp002367455	97.73	Alkane-1 monooxygenase (67.5%), Lipase (52.4%), Polyesterase (52.8%)	alkB, almA
BLB10	Bold 1NV	Lysogeny Broth	Bow River	Water	d__Bacteria;p__Actinomycetota;c__Actinomycetes;o__Actinomycetales;f__Micrococcaceae;g__Arthrobacter;s__	93.03	N/A	N/A
BR2A2	Bold 1NV	R2A	Bow River	Water	d__Bacteria; p__Actinomycetota; c__Actinomycetia; o__Actinomycetales; f__Micrococcaceae; g__Arthrobacter; s__	N/A	N/A	N/A
BR2A5	Bow	R2A	Bow River	Water	d__Bacteria;p__Actinomycetota;c__Actinomycetes;o__Actinomycetales;f__Micrococcaceae;g__Arthrobacter;s__	93.2	N/A	N/A
BLB9	Bold 1NV	Lysogeny Broth	Bow River	Water	d__Bacteria;p__Actinomycetota;c__Actinomycetes;o__Actinomycetales;f__Microbacteriaceae;g__Cryobacterium;s__	87.66	PETase (61.8%)	ladAα
BR2A1	Bold 1NV	R2A	Bow River	Water	d__Bacteria; p__Actinomycetota; c__Actinomycetia; o__Actinomycetales; f__Microbacteriaceae; g__Cryobacterium; s__	86.32	PETase (61.8%), Esterase (52.3%), Nitrobenzylesterase (51.9%)	ladAα
BR2A4	Bow	R2A	Bow River	Water	d__Bacteria;p__Actinomycetota;c__Actinomycetes;o__Actinomycetales;f__Microbacteriaceae;g__Cryobacterium;s__Cryobacterium lactosi	95.09	PETase (61.8%)	ladAα
WLB12	Bold 1NV	Lysogeny Broth	North Wabasca Lake	Water	d__Bacteria;p__Actinomycetota;c__Actinomycetes;o__Actinomycetales;f__Microbacteriaceae;g__Cryobacterium;s__	88.35	PETase (61.8%)	ladAα
WR2A3	Bold 1NV	R2A	North Wabasca Lake	Sediment	d__Bacteria;p__Actinomycetota;c__Actinomycetes;o__Actinomycetales;f__Microbacteriaceae;g__Cryobacterium;s__	N/A	PETase (61.8%), Esterase (52.3%), Nitrobenzylesterase (51.9%)	ladAα
BLB1	Bow	Lysogeny Broth	Bow River	Water	d__Bacteria;p__Actinomycetota;c__Actinomycetes;o__Actinomycetales;f__Cellulomonadaceae;g__Sanguibacter;s__	85.42	N/A	N/A
WLB7	Bow	Lysogeny Broth	North Wabasca Lake	Water	d__Bacteria;p__Actinomycetota;c__Actinomycetes;o__Actinomycetales;f__Cellulomonadaceae;g__Sanguibacter;s__	85.42	N/A	N/A

## Sheet: S2
Supplementary Data 2. Final calculated weight losses of the 14 isolates and experimental control after a seven month incubation period.
Isolate ID	Classification	Initial Weight (g)	Final Weight (g)	Weight Loss (g)	Corrected Weight Loss (g)	Corrected Weight Loss (%)
BLB2	Acinetobacter (BLB2)	0.2	0.16	0.04	0.01	5
BLB8	Acinetobacter (BLB8)	0.2	0.14	0.06	0.03	15
BLB11	Acinetobacter (BLB11)	0.2	0.16	0.04	0.01	5
WLB5	Acinetobacter (WLB5)	0.2	0.15	0.05	0.02	10
BLB10	Arthrobacter (BLB10)	0.2	0.15	0.05	0.02	10
BR2A2	Arthrobacter (BR2A2)	0.2	0.14	0.06	0.03	15
BR2A5	Arthrobacter (BR2A5)	0.2	0.16	0.04	0.01	5
BLB9	Cryobacterium (BLB9)	0.2	0.12	0.08	0.05	25
BR2A1	Cryobacterium (BR2A1)	0.2	0.17	0.03	0	0
BR2A4	Cryobacterium Lactosi (BR2A4)	0.2	0.17	0.03	0	0
WLB12	Cryobacterium (WLB12)	0.2	0.16	0.04	0.01	5
WR2A3	Cryobacterium (WR2A3)	0.2	0.15	0.05	0.02	10
BLB1	Sanguibacter (BLB1)	0.2	0.12	0.08	0.05	25
WLB7	Sanguibacter (WLB7)	0.2	0.15	0.05	0.02	10
Control	N/A	0.2	0.17	0.03	0	0

## Sheet: S3
Supplementary Data 3. Monthly optical Density (600nm) measurements of microcosms during LDPE degradation experiment.
		Days of Incubation
Isolate ID	Classification	40	77	103	137	160	196
BLB2	Acinetobacter (BLB2)	0.009	0.003	0.004	0.009	0.01	0.007
BLB8	Acinetobacter (BLB8)	0.008	0.008	0.008	0.011	0	0.009
BLB11	Acinetobacter (BLB11)	0	0.043	0	0.01	0.003	0.001
WLB5	Acinetobacter (WLB5)	0.003	0.001	0.008	0.009	0.004	0.004
BLB10	Arthrobacter (BLB10)	0.005	0.006	0.001	0.008	0.003	0.009
BR2A2	Arthrobacter (BR2A2)	0.001	0.005	0	0.006	0.004	0.002
BR2A5	Arthrobacter (BR2A5)	0.001	0	0.003	0.003	0	0.002
BLB9	Cryobacterium (BLB9)	0.006	0.012	0.01	0.008	0.004	0.006
BR2A1	Cryobacterium (BR2A1)	0.001	0.007	0.004	0.007	0.004	0.002
BR2A4	Cryobacterium lactosi (BR2A4)	0.002	0.003	0.001	0	0.002	0.002
WLB12	Cryobacterium (WLB12)	0.006	0.012	0.004	0.038	0.007	0.008
WR2A3	Cryobacterium (WR2A3)	0.004	0.006	0.003	0.048	0.006	0.002
BLB1	Sanguibacter (BLB1)	0.003	0.012	0.012	0.001	0.002	0.002
WLB7	Sanguibacter (WLB7)	0.002	0.004	0.007	0.015	0.007	0.002
Control	N/A	0	0	0	0	0	0

## Sheet: S4
Supplementary Data 4. Cell densities (cells/mL) of the 14 isolates including standard deviation at months five and six of incubation.
Isolate ID	Classification	Month 5 (cells/mL)	Month 5 Standard Deviation	Month 6 (cells/mL)	Month 6 Standard Deviation
BLB2	Acinetobacter (BLB2)	1.37384e+06	171113	1.4578e+06	91645
BLB8	Acinetobacter (BLB8)	426063	72882.7	442354	55494
BLB11	Acinetobacter (BLB11)	2.36674e+06	461907	2.22848e+06	272939
WLB5	Acinetobacter (WLB5)	418127	118050	634500	68801.6
BLB10	Arthrobacter (BLB10)	2.13157e+06	223223	1.97159e+06	107803
BR2A2	Arthrobacter (BR2A2)	1.97911e+06	282311	2.67459e+06	150360
BR2A5	Arthrobacter (BR2A5)	225563	48980.7	1.38429e+06	122762
BLB9	Cryobacterium (BLB9)	248119	90924.4	1.17334e+06	101161
BR2A1	Cryobacterium (BR2A1)	1.29197e+06	237478	1.56098e+06	242237
BR2A4	Cryobacterium lactosi (BR2A4)	3.86715e+06	235500	2.32163e+06	152732
WLB12	Cryobacterium (WLB12)	186716	46532.9	317459	27726.6
WR2A3	Cryobacterium (WR2A3)	926061	85836.9	1.16123e+06	103693
BLB1	Sanguibacter (BLB1)	581869	70224.8	692562	110884
WLB7	Sanguibacter (WLB7)	27151.1	9831.7	221386	47549.2

## Sheet: S5 
Supplementary Data 5. GCMS results of detected compounds, their assigned classification, and concentration (μg/L) of each based on a C16 response factor after a 7 month incubation period.
Detected Compound	Compound Classification	BLB2	BLB8	BLB11	WLB5	BLB10	BR2A2	BR2A5	BLB9	BR2A1	BR2A4	WLB12	WR2A3	BLB1	WLB7
C10	Straight-chain Alkane	5.16402	11.0551	6.01642	0	0	4.74865	0	0	0	0	0	6.12762	0	0
C11	Straight-chain Alkane	5.42366	7.17103	0	0	0	4.78637	0	0	4.6956	5.60567	0	5.2543	0	0
C13	Straight-chain Alkane	0	0	0	0	0	4.05174	0	0	0	0	0	0	0	0
C15	Straight-chain Alkane	3.8123	6.46196	3.06916	0	0	0	0	0	0	5.41027	0	5.09686	0	0
C16	Straight-chain Alkane	21.6951	64.1935	19.4017	6.70383	3.81255	13.5237	0	3.41883	10.2796	25.4213	6.352	27.1017	11.6564	6.23809
C17	Straight-chain Alkane	3.39085	7.28564	4.58002	2.6353	0	3.30617	0	0	4.4878	7.66038	1.937	5.94974	3.68918	0
C18	Straight-chain Alkane	17.5967	42.5446	18.9372	8.15459	0	12.1715	0	0	6.62499	21.6292	5.192	22.9955	8.85271	0
C19	Straight-chain Alkane	2.26641	4.59292	2.94287	1.84106	0	0	0	0	0	3.37844	0	5.9366	0	0
C24	Straight-chain Alkane	20.2901	30.1911	19.3104	22.6838	0	18.6167	7.01603	0	6.91894	28.0315	2.302	29.1472	18.5547	6.56294
C25	Straight-chain Alkane	9.1014	6.70773	6.62061	10.065	0	7.04791	0	0	0	7.41583	0	8.56533	7.28005	0
C26	Straight-chain Alkane	5.40735	6.94644	4.91022	3.11613	0	3.11759	0	0	0	3.97339	0	0	3.85391	0
Heptane, 2,3-dimethyl-	Branched-chain Alkane	4.79805	4.78466	4.53744	4.22232	0	4.38949	4.82189	0	4.35907	4.21088	0	5.26622	4.88759	4.88248
Heptane, 3,4,5-trimethyl-	Branched-chain Alkane	4.60703	0	0	4.7287	0	3.99553	0	4.67565	4.4092	0	0	0	0	0
Heptane, 3-ethyl-3-methyl-	Branched-chain Alkane	0	5.59788	0	0	0	0	0	0	0	0	0	0	0	0
Decane, 3,6-dimethyl-	Branched-chain Alkane	7.11288	0	0	4.1447	0	0	0	0	0	6.88366	4.377	0	0	0
Undecane, 3,7-dimethyl-	Branched-chain Alkane	0	0	0	0	0	0	0	0	0	0	4.4	0	0	0
Undecane, 3,8-dimethyl-	Branched-chain Alkane	0	3.10858	0	0	0	0	0	0	0	0	0	3.9145	0	0
Undecane, 3,8-dimethyl-	Branched-chain Alkane	0	8.49039	0	0	0	0	0	0	0	0	0	10.2159	0	0
2-Decene, 6-methyl-, (Z)-	Alkene	0	3.29327	0	0	0	0	0	3.72251	0	0	0	0	0	0
1-Eicoscene	Alkene	0	0	0	0	0	0	0	0	0	4.3783	0	0	0	0
5-Eicosene, (E)-	Alkene	0	0	0	0	0	0	0	0	0	0	0	10.2438	0	0
2-Undecene, 10-methyl-	Alkene	0	0	0	0	0	0	2.97159	0	0	0	0	0	0	0
Isobutyl 2-methylpentyl carbonate	Ester	0	0	0	0	0	0	1.08721	0	6.0955	4.56031	4.76	5.57477	0	1.33541
Malonic acid, dihydroxy-, diisobutyl ester	Ester	8.1232	0	9.23304	1.79239	0	0	0	0	0	0	0	0	0	0
Sulfurous acid, cyclohexylmethyl hexyl ester	Ester	0	4.27561	0	0	0	0	0	0	0	0	0	0	0	0
Sulfurous acid, 2-ethylhexyl isohexyl ester	Ester	0	0	0	0	6.12421	0	0	0	0	0	0	0	0	0
Oxalic acid, heptyl isohexyl ester	Ester	0	0	0	0	0	0	0	0	0	0	0	0	2.0148	0
Diglycolic acid, butyl heptyl ester	Ester	0	0	0	0	0	0	0	3.577	0	0	0	0	0	0
Triethylenediamine	Amine	0	0	0	0	0	0	0	0	0	63.7336	0	17.5137	0	0
1-Piperazineethanol	Amine	18.0994	15.8167	0	0	0	0	0	0	0	0	0	0	0	0
2-Propen-1-amine, N,N-bis(1-methylethyl)-	Amine	0	0	0	0	0	6.21303	0	0	5.46648	0	0	6.17848	0	5.6592
1-Methyl-5-piperidin-1-yl-imidazolidin-2,4-dione	Amine	0	0	0	0	0	0	0	0	0	0	5.34	0	0	0
Furan, tetrahydro-2,2,4,4-tetramethyl-	Aromatic	0	0	0	0	0	0	0	5.22169	0	0	6.611	0	0	0
Furan, tetrahydro-2,2,5,5-tetramethyl-	Aromatic	0	0	0	0	0	0	0	0	0	0	0	0	0	6.77635
Benzene, 1,3-bis(1,1-dimethylethyl)-	Aromatic	8.17065	16.3498	8.11711	5.67551	4.2615	7.7217	0	0	5.14918	8.12806	6.667	11.4878	0	0
phenol, 2-mercapto-5-(octadecyloxy)-	Aromatic	0	4.37002	0	0	0	0	0	0	0	0	0	0	0	0
Hexanal, 3,3-dimethyl-	Other (Aldehyde)	0	0	0	0	0	0	0	1.20693	0	0	0	0	0	0
1-Octanol, 2-butyl-	Other (Alcohol)	4.28145	6.27459	0	0	0	0	0	0	0	5.22656	0	5.922	0	0
Palmitic Acid, Hexadecanoic acid	Other (Fatty Acid)	0	0	0	0	0	0	0	0	0	7.3236	0	2.78179	1.77877	0
